# Supplementary material for: Copper binding alters the core structure of amyloid fibrils formed by Y145Stop human prion protein
Source: Royal Society of Chemistry journal article supplement (doi:10.1039/d4cp03593c), 2024-01-01
Supplement: d4cp03593c1.pdf [file d4cp03593c1.pdf]

## Supplementary Information

### Copper binding alters the core structure of amyloid fibrils formed by Y145Stop human prion protein

Vidhyalakshmi Sridharan,<sup>a</sup> Tara George,<sup>a</sup> Daniel W. Conroy,<sup>a</sup> Zach Shaffer,<sup>a</sup> Witold K. Surewicz<sup>b</sup>  
and Christopher P. Jaronec<sup>a\*</sup>

<sup>a</sup> *Department of Chemistry and Biochemistry, The Ohio State University, Columbus, OH, United States*

<sup>b</sup> *Department of Physiology and Biophysics, Case Western Reserve University, Cleveland, OH, United States*

\*E-mail: jaronec.1@osu.edu

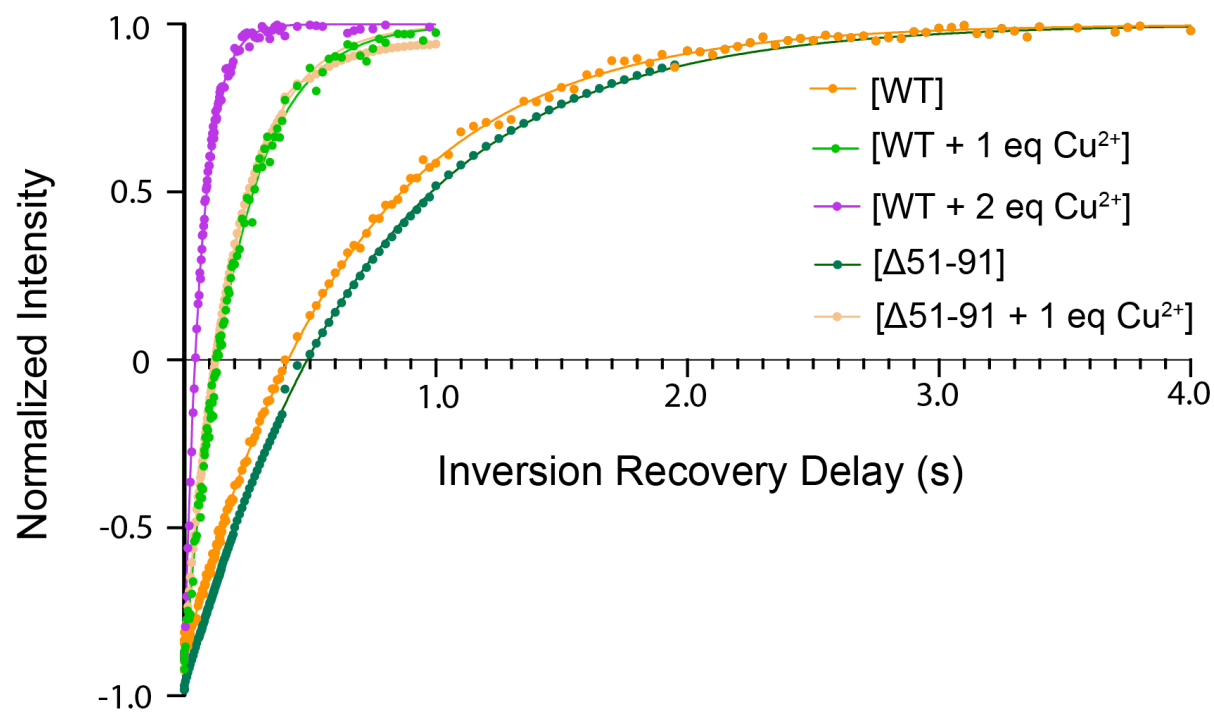

**Fig. S1.** Measurements of bulk amide  $^1\text{H}$   $T_1$  relaxation time constants for amyloid fibrils formed by WT and  $\Delta 51-91$  huPrP23-144 containing different amounts of bound  $\text{Cu}^{2+}$  as indicated in the inset. The  $^1\text{H}$   $T_1$  values extracted from the data were as follows, WT:  $652 \pm 6$  ms, WT + 1 eq  $\text{Cu}^{2+}$ :  $204 \pm 4$  ms, WT + 2 eq  $\text{Cu}^{2+}$ :  $66 \pm 1$  ms,  $\Delta 51-91$ :  $760 \pm 4$  ms,  $\Delta 51-91$  + 1 eq  $\text{Cu}^{2+}$ :  $185 \pm 3$  ms.

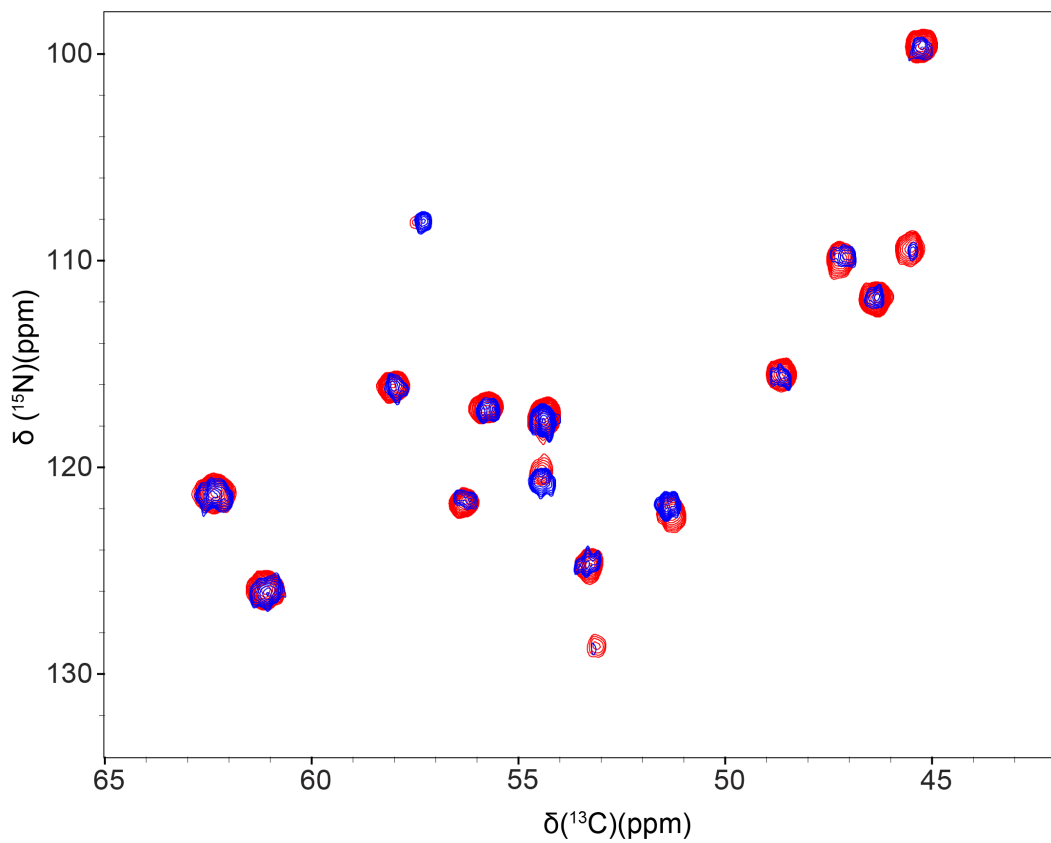

**Fig. S2.** Comparison of 2D  $^{15}\text{N}$ - $^{13}\text{C}\alpha$  solid-state NMR spectra recorded for two independent preparations of amyloid fibrils formed by huPrP23-144 containing one molar equivalent of bound  $\text{Cu}^{2+}$ , illustrating the high degree of sample reproducibility. For experimental parameters see main text and Fig. 3 caption.

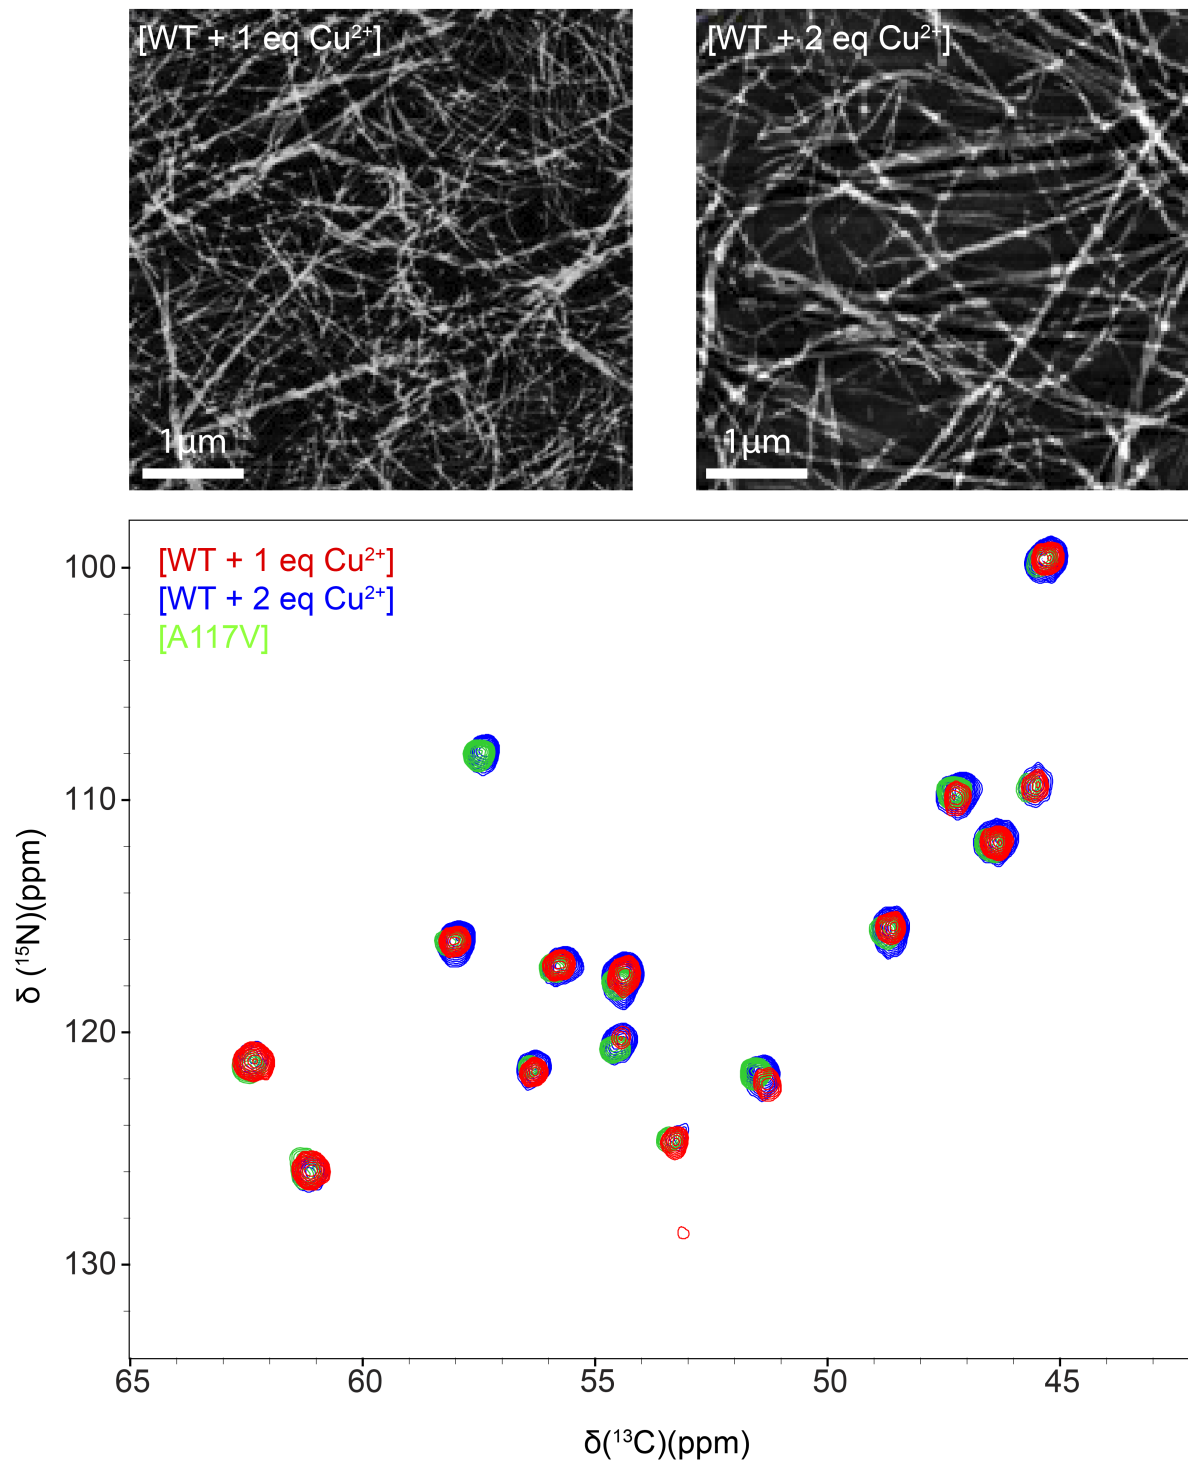

**Fig. S3.** AFM images (top) and 2D <sup>15</sup>N-<sup>13</sup>C<sub>α</sub> solid-state NMR spectra (bottom) of fibrils formed by huPrP23-144 containing two molar equivalents of bound Cu<sup>2+</sup> (blue contours). The NMR spectra are overlaid with corresponding spectra of fibrils formed by huPrP23-144 containing one equivalent of bound Cu<sup>2+</sup> (red contours) and A117V mutant of huPrP23-144 (green contours). For experimental parameters see main text and Fig. 3 caption.
